# Supplementary material for: An Iterative Approach for the Parameter Estimation of Shear-Rate and Temperature-Dependent Rheological Models for Polymeric Liquids
Source: MDPI journal article supplement (doi:10.3390/polym13234185), 2021-11-30
Supplement: s1 [file s1]

# Supporting Material for “An Iterative Approach for the Parameter Estimation Of Shear-Rate and Temperature-Dependent Viscosity Models for Polymeric Liquids”

Medeu Amangeldi, Yanwei Wang\*, Asma Perveen, Dichuan Zhang, and Dongming Wei\*

Nazarbayev University, Nur-Sultan 010000, Kazakhstan

Correspondence: yanwei.wang@nu.edu.kz (Y.W.); dongming.wei@nu.edu.kz (D.W.)

---

## 1. Viscosity as a function of shear rate and temperature

To clear all definitions of quantities you’ve introduced in a Mathematica session so far, type: `ClearAll["Global`*"]`

`In[*]:= ClearAll["Global`*"]`

$$\log_{10}(a_T^*) = -\frac{A_0(T - T_{ref})}{B_0 + (T - T_{ref})}$$

$$\log_{10}(a_T) = -\frac{A_1(T - T_{ref})}{B_1 + (T - T_{ref})}$$

$$\eta(\dot{\gamma})/a_T^* = \eta_\infty + (\eta_0 - \eta_\infty) \left[ 1 + (\lambda a_T \dot{\gamma})^a \right]^{\frac{n-1}{a}}$$

| #   | $\eta_{\infty}$ | $\eta_0$     | $a$    | $n$    | $\lambda$ | $a_T^*$                   | $a_T$                     | AIC     | BIC     | $adjR^2$ |
|-----|-----------------|--------------|--------|--------|-----------|---------------------------|---------------------------|---------|---------|----------|
| 1   | 40476.13        | 598346954.87 | 0.7968 | 0.1054 | 4725.29   | 1<br>0.003522<br>0.001023 | 1<br>0.003552<br>0.001089 | -413.93 | -403.54 | 0.9994   |
| 2   | 40476.32        | 598346954.87 | 0.7981 | 0.1059 | 4726.26   | 1<br>0.003364<br>0.000974 | 1<br>0.003593<br>0.000958 | -446.72 | -436.33 | 0.9996   |
| ... | ...             | ...          | ...    | ...    | ...       | ...                       | ...                       | ...     | ...     | ...      |
| 37  | 37190.11        | 598346954.87 | 1.2160 | 0.1477 | 6911.72   | 1<br>0.002356<br>0.000753 | 1<br>0.002131<br>0.000636 | -486.74 | -476.35 | 0.9998   |

Table 4: Fitted coefficients of WLF for each case

| Model by                            | $A_0$     | $A_1$      | $B_0$       | $B_1$       |
|-------------------------------------|-----------|------------|-------------|-------------|
| Traditional method                  | 8.7065088 | 7.97907227 | 76.4700812  | 67.72598488 |
| Global algorithm: <i>Scenario I</i> | 7.1865105 | 7.78847416 | 52.04696748 | 57.46612279 |

```

ln[ ]:= Atstar[Temp_, A0_, B0_, Tref_] := 10^(-A0 (Temp - Tref) / (B0 + Temp - Tref));
At[Temp_, A1_, B1_, Tref_] := 10^(-A1 (Temp - Tref) / (B1 + Temp - Tref));
EtaCYTemp[x_, Temp_, EtaInf_, EtaZero_, a_, n_, Lambda_, A0_, B0_, A1_, B1_, Tref_] :=
(EtaInf + (EtaZero - EtaInf) (1 + (Lambda * (At[Temp, A1, B1, Tref]) * x)^a)^(n-1)/a) *
Atstar[Temp, A0, B0, Tref];

```

```

In[ ]:= figviscosity101 =
ContourPlot[Log10[EtaCYTemp[10^loggamma, temp, 37190.11, 598346954.87, 1.2160,
0.1477, 6911.72, 7.1865105, 52.04696748, 7.78847416, 57.46612279, 403.15]],
{loggamma, -2, 3}, {temp, 403.15, 443.15}, AspectRatio -> 1, PlotTheme -> "Business",
PlotLegends -> Automatic, ColorFunction -> "LightTemperatureMap",
ContourLabels -> True, PlotPoints -> 50, FrameLabel -> {"Log10[ $\dot{\gamma}/(1 \text{ s}^{-1})]$ ", "T [K]"},
AxesStyle -> Directive[Black, AbsoluteThickness[3]],
Method -> {"DefaultBoundaryStyle" -> Automatic,
"DefaultMeshStyle" -> AbsolutePointSize[6], "ScalingFunctions" -> None}, Mesh -> Full,
PlotLabel -> Style["Log10[ $\eta/(1 \text{ Pa}\cdot\text{s})$ ], This work", Black, FontSize -> 16],
Background -> White, ImageSize -> 300, AspectRatio -> 1,
BaseStyle -> {FontWeight -> "Bold", Black, FontSize -> 16}]

```

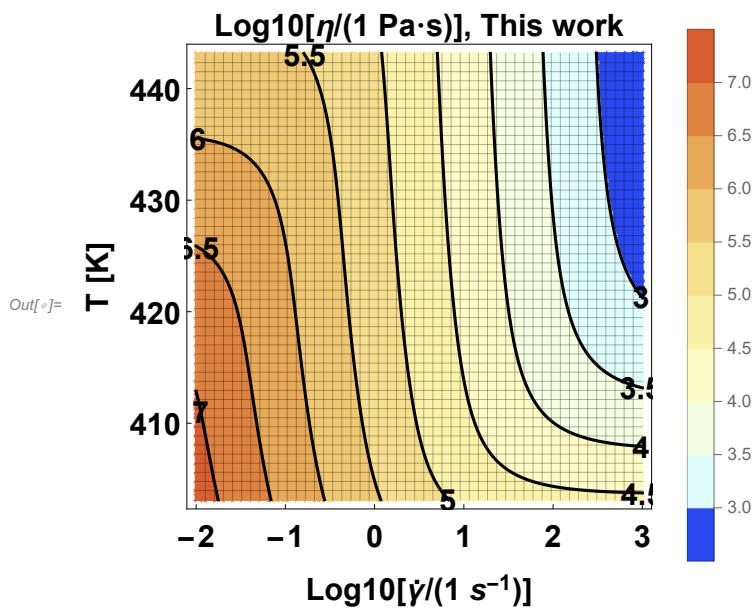

#### Percentage Difference Calculator

$$\frac{|V_1 - V_2|}{\left[\frac{(V_1 + V_2)}{2}\right]} \times 100 = ?$$

Difference between  $V_1$  and  $V_2$

$V_1$  =

$V_2$  =

#### Calculator Use

The Percentage Difference Calculator (% difference calculator) will find the percent difference between two positive numbers greater than 0. Percentage difference is usually calculated when you want to know the difference in percentage between two numbers. For this calculator, the order of the numbers does not matter as we are simply dividing the difference between two numbers by the average of the two numbers. To calculate the difference relatively, from an old number to a new number, you would [calculate percentage change](#).

Percentage Change Calculator

$$\frac{(V_2 - V_1)}{|V_1|} \times 100 = ?$$

Change from  $V_1$  to  $V_2$

$V_1 =$

$V_2 =$

Answer:

### Calculator Use

The Percentage Change Calculator (% change calculator) will quantify the change from one number to another and express the change as an increase or decrease.

This is a % change calculator. From 10 apples to 20 apples is a 100% **increase** (change) in the number of apples.

This calculator will be most commonly used when there is an “old” and “new” number or an “initial” and “final” value. A positive change is expressed as an increase amount of the percentage value while a negative change is expressed as a decrease amount of the absolute value of the percentage value.

Percentage difference:  $[\eta(\text{traditional}) - \eta(\text{this work})] / ((\eta(\text{traditional}) + \eta(\text{this work})) / 2)$

```

In[ ]:= figviscosity103 =
  ContourPlot[100 * ((EtaCYTemp[10^loggamma, temp, 40476.13, 598346954.87, 0.7968,
    0.1054, 4725.29, 8.7065088, 76.4700812, 7.97907227, 67.72598488, 403.15] -
    EtaCYTemp[10^loggamma, temp, 37190.11, 598346954.87, 1.2160, 0.1477,
    6911.72, 7.1865105, 52.04696748, 7.78847416, 57.46612279, 403.15]) /
    ((EtaCYTemp[10^loggamma, temp, 40476.13, 598346954.87, 0.7968, 0.1054,
    4725.29, 8.7065088, 76.4700812, 7.97907227, 67.72598488, 403.15] +
    EtaCYTemp[10^loggamma, temp, 37190.11, 598346954.87, 1.2160, 0.1477,
    6911.72, 7.1865105, 52.04696748, 7.78847416, 57.46612279, 403.15]) / 2)),
  {loggamma, -2, 4}, {temp, 400, 450}, AspectRatio -> 1,
  PlotTheme ->
    "Business", PlotLegends ->
      Automatic,
  ColorFunction -> "LightTemperatureMap", ContourLabels -> True,
  PlotPoints -> 50,
  FrameLabel -> {"Log10[ $\dot{\gamma}/(1 \text{ s}^{-1})$ ]", "T [K]"},
  AxesStyle ->
    Directive[RGBColor[0., 0., 0.], AbsoluteThickness[3]],
  Method -> {"DefaultBoundaryStyle" -> Automatic,
    "DefaultMeshStyle" -> AbsolutePointSize[6], "ScalingFunctions" -> None},
  Mesh -> Full, PlotLabel -> Style["Percentage difference, %", Black, FontSize -> 16],
  Background -> White,
  ImageSize -> 300,
  AspectRatio -> 1,
  BaseStyle -> {FontWeight -> "Bold", Black, FontSize -> 16}]

```

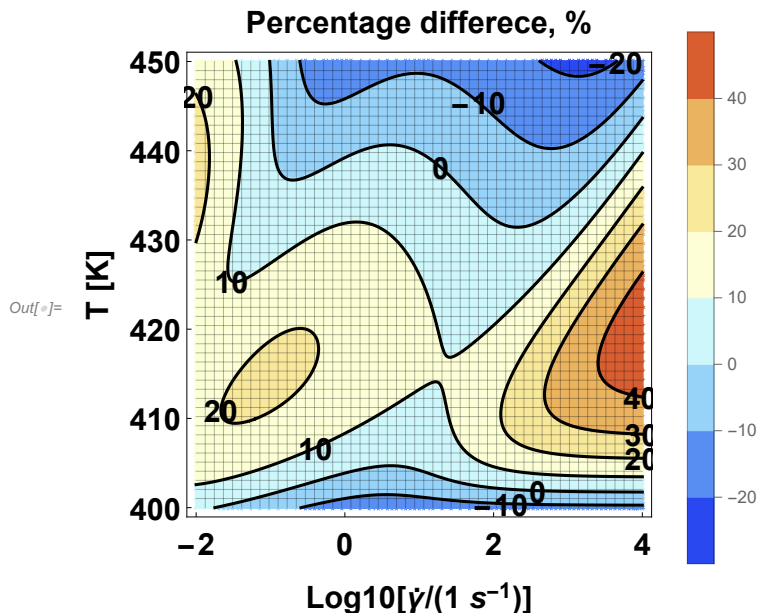

```

In[ ]:= Export["ShearRateTemperatureViscosity.pdf",
  figviscosity101, "AllowRasterization" -> True, ImageResolution -> 600];
Export["ShearRateTemperatureViscosityPD.pdf", figviscosity103,
  "AllowRasterization" -> True, ImageResolution -> 600];

```

## 2. Comparison on the predicted Shear Viscosity, isothermal case (“403.15 K”, “433.15 K”, “443.15 K”)

To clear all definitions of quantities you’ve introduced in a Mathematica session so far, type: `ClearAll[“Global`*”]`

```
In[ ]:= ClearAll["Global`*"]
```

```
In[ ]:= EtaCY[x_, EtaInf_, EtaZero_, a_, n_, Lambda_, atstar_, at_] :=
  (EtaInf + (EtaZero - EtaInf) (1 + (Lambda * at * x)^a)^(n-1)/a) * atstar;
  (** Define the C-Y model viscosity function **)
```

```
In[ ]:= figviscosity201 =
  LogLogPlot[{EtaCY[x, 37190.11, 598346954.87, 1.2160, 0.1477, 6911.72, 1, 1],
    EtaCY[x, 40476.13, 598346954.87, 0.7968, 0.1054, 4725.29, 1, 1],
    EtaCY[x, 37190.11, 598346954.87, 1.2160, 0.1477, 6911.72, 0.002356, 0.002131],
    EtaCY[x, 40476.13, 598346954.87, 0.7968, 0.1054, 4725.29, 0.003522, 0.003552],
    EtaCY[x, 37190.11, 598346954.87, 1.2160, 0.1477, 6911.72, 0.000753, 0.000636],
    EtaCY[x, 40476.13, 598346954.87, 0.7968, 0.1054, 4725.29, 0.001023, 0.001089]},
    {x, 10^-2, 10^4}, Frame → True, AxesOrigin → {0, 0},
    PlotStyle → {{Black, Thick}, {Black, Dashed, Thick}, {Blue, Thick},
      {Blue, Dashed, Thick}, {Red, Thick}, {Red, Dashed, Thick}},
    GridLines → None, FrameLabel → {"γ̇ [s⁻¹]", "η [Pa·s]"},
    LabelStyle → Directive[FontFamily → "Times", FontSize → 16, Black],
    PlotLegends → Placed[{"This work", "Traditional"}, {0.70, 0.85}],
    Background → White, ImageSize → 300, AspectRatio → 1,
    BaseStyle → {FontWeight → "Bold", Black, FontSize → 16}]
```

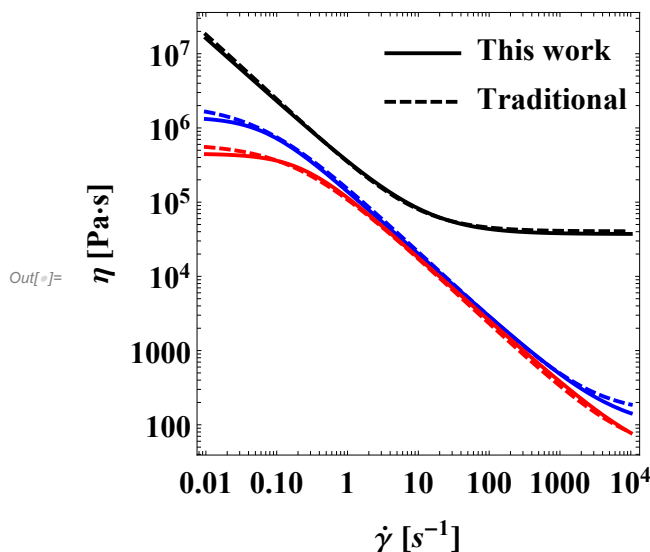

```

In[ ]:= pdt1[x_] := 100 * ( EtaCY[x, 40476.13, 598346954.87, 0.7968, 0.1054, 4725.29, 1, 1] -
    EtaCY[x, 37190.11, 598346954.87, 1.2160, 0.1477, 6911.72, 1, 1]) /
    (( EtaCY[x, 40476.13, 598346954.87, 0.7968, 0.1054, 4725.29, 1, 1] +
    EtaCY[x, 37190.11, 598346954.87, 1.2160, 0.1477, 6911.72, 1, 1]) / 2);
pdt2[x_] := 100 * ( EtaCY[x, 40476.13, 598346954.87, 0.7968,
    0.1054, 4725.29, 0.003522, 0.003552] -
    EtaCY[x, 37190.11, 598346954.87, 1.2160, 0.1477, 6911.72, 0.002356, 0.002131]) /
    (( EtaCY[x, 40476.13, 598346954.87, 0.7968, 0.1054, 4725.29, 0.003522, 0.003552] +
    EtaCY[x, 37190.11, 598346954.87, 1.2160,
    0.1477, 6911.72, 0.002356, 0.002131]) / 2);
pdt3[x_] := 100 * (EtaCY[x, 40476.13, 598346954.87, 0.7968, 0.1054,
    4725.29, 0.001023, 0.001089] -
    EtaCY[x, 37190.11, 598346954.87, 1.2160, 0.1477, 6911.72, 0.000753, 0.000636]) /
    ((EtaCY[x, 40476.13, 598346954.87, 0.7968, 0.1054, 4725.29, 0.001023, 0.001089] +
    EtaCY[x, 37190.11, 598346954.87, 1.2160,
    0.1477, 6911.72, 0.000753, 0.000636]) / 2);

In[ ]:= figviscosity202 = LogLinearPlot[{pdt1[x], pdt2[x], pdt3[x]},
    {x, 10-2, 104}, Frame → True, AxesOrigin → {0, 0}, PlotRange → {-20, 30},
    PlotStyle → {{Black, Thick}, {Blue, Thick}, {Red, Thick}},
    GridLines → None, Framelabel → {"γ̇ [s-1]", "Percentage difference, %"},
    LabelStyle → Directive[FontFamily → "Times", FontSize → 16, Black],
    PlotLegends → Placed[{"403.15 K", "433.15 K", "443.15 K"}, {0.70, 0.80}],
    Background → White, ImageSize → 300, AspectRatio → 1]

```

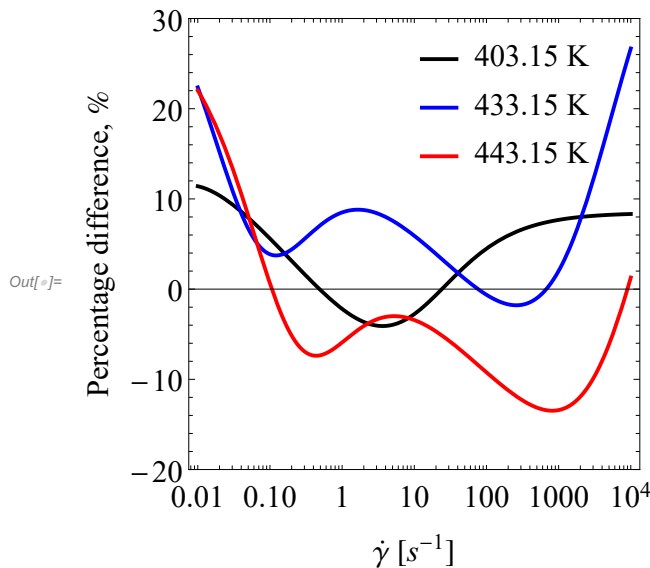

```

In[ ]:= Export["figviscositycomparison.pdf", figviscosity201,
    "AllowRasterization" → True, ImageResolution → 600];
Export["figviscosityPD.pdf", figviscosity202,
    "AllowRasterization" → True, ImageResolution → 600];

In[ ]:= SystemOpen[DirectoryName[AbsoluteFileName["figviscositycomparison.pdf"]]]

```

## 3. Average Flow Velocity and Shear Rate at the Wall, isothermal case (“433.15 K”)

### 3.1 Average Flow Velocity

To clear all definitions of quantities you’ve introduced in a Mathematica session so far, type: `ClearAll[“-Global`*”]`

```
In[ ]:= ClearAll["Global`*"]

In[ ]:= EtaCY[x_, EtaInf_, EtaZero_, a_, n_, Lambda_, atstar_, at_] :=
  (EtaInf + (EtaZero - EtaInf) (1 + (Lambda * at * x)^a)^(n-1)/a) * atstar;
(** Define the C-Y model viscosity function **)

In[ ]:= PipeRadius = 0.05; (**Pipe radius m**)
CrossSection = Pi * PipeRadius^2;
M = 191;
Do[
  PGradient[i] = 1 + (i - 1) * 0.1 (**MPa/m**);
  (**ode01= (-D[vz[r], r]) * EtaCY[Abs[D[vz[r], r]], 37079.27, 449711022.23,
    1.241, 0.15, 5064.697, 0.00311, 0.00293] == 0.5 * PGradient[i] * 10^6 * r;
  ysol01 = NDSolveValue[{ode01, vz[PipeRadius] == 0}, vz, {r, 0, PipeRadius},
    Method -> {"EquationSimplification" -> "Residual"}];
  WallShearRate01[i] = (-D[ysol01[r], r] /. r -> PipeRadius);
  AvgVel01[i] = NIntegrate[ysol01[r] * 2 * Pi * r, {r, 0, PipeRadius}] / CrossSection; **)
  ode02 = (-D[vz[r], r]) * EtaCY[Abs[D[vz[r], r]], 37190.11, 598346954.87,
    1.2160, 0.1477, 6911.72, 0.002356, 0.002131] == 0.5 * PGradient[i] * 10^6 * r;
  ysol02 = NDSolveValue[{ode02, vz[PipeRadius] == 0}, vz, {r, 0, PipeRadius},
    Method -> {"EquationSimplification" -> "Residual"}];
  WallShearRate02[i] = (-D[ysol02[r], r] /. r -> PipeRadius);
  AvgVel02[i] = NIntegrate[ysol02[r] * 2 * Pi * r, {r, 0, PipeRadius}] / CrossSection;
  ode03 = (-D[vz[r], r]) * EtaCY[Abs[D[vz[r], r]], 40476.13, 598346954.87,
    0.7968, 0.1054, 4725.29, 0.003522, 0.003552] == 0.5 * PGradient[i] * 10^6 * r;
  ysol03 = NDSolveValue[{ode03, vz[PipeRadius] == 0}, vz, {r, 0, PipeRadius},
    Method -> {"EquationSimplification" -> "Residual"}];
  WallShearRate03[i] = (-D[ysol03[r], r] /. r -> PipeRadius);
  AvgVel03[i] = NIntegrate[ysol03[r] * 2 * Pi * r, {r, 0, PipeRadius}] / CrossSection;
, {i, 1, M}];
```



```

In[ ]:= Figure6a = ListPlot[{Table[{PGradient[i], AvgVel02[i]}, {i, 1, M}],
  Table[{PGradient[i], AvgVel03[i]}, {i, 1, M}]}],
  PlotMarkers -> {{O, 6}, {□, 6}}, PlotStyle -> {Red, Blue}, GridLines -> None,
  PlotRange -> All, GridLinesStyle -> Directive[Dashed],
  Frame -> True, FrameLabel -> {"ΔP/L [MPa/m]", "vavg [m/s]"},
  LabelStyle -> Directive[FontFamily -> "Times", FontSize -> 18, Black],
  Background -> White, ImageSize -> 300, AspectRatio -> 1,
  PlotLegends -> Placed[{"This work", "Traditional"}, {0.25, 0.75}]]

```

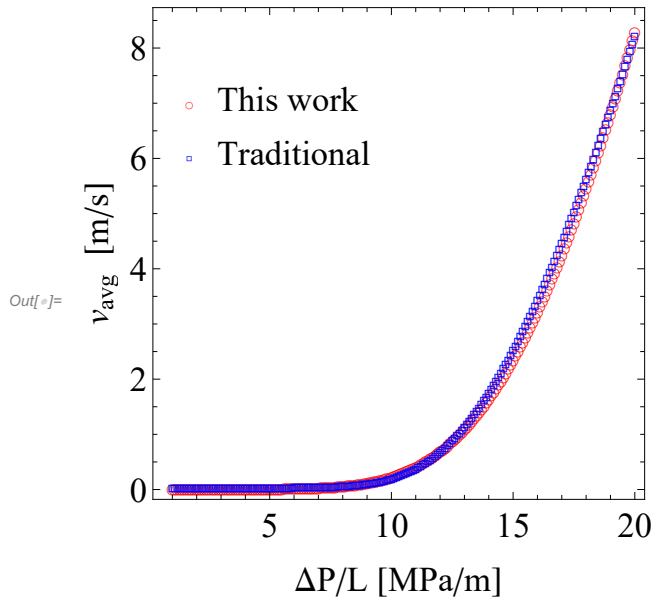

```

In[ ]:= PercentageErrorVel =
  Table[{PGradient[i], 100 * (AvgVel03[i] - AvgVel02[i]) / ((AvgVel02[i] + AvgVel03[i]) / 2)},
    {i, 1, M}]; (** Percentage difference **)

```

```

In[ ]:= Figure6b = ListPlot[PercentageErrorVel, PlotMarkers → {{□, 6}}, PlotStyle → {Black},
  GridLines → None, PlotRange → {-60, 40}, GridLinesStyle → Directive[Dashed],
  Frame → True, FrameLabel → {"ΔP/L [MPa/m]", "Percentage difference, %"},
  LabelStyle → Directive[FontFamily → "Times", FontSize → 16, Black],
  Background → White, ImageSize → 300, AspectRatio → 1,
  PlotLegends → Placed[{"in average velocity"}, {0.60, 0.87}]]

```

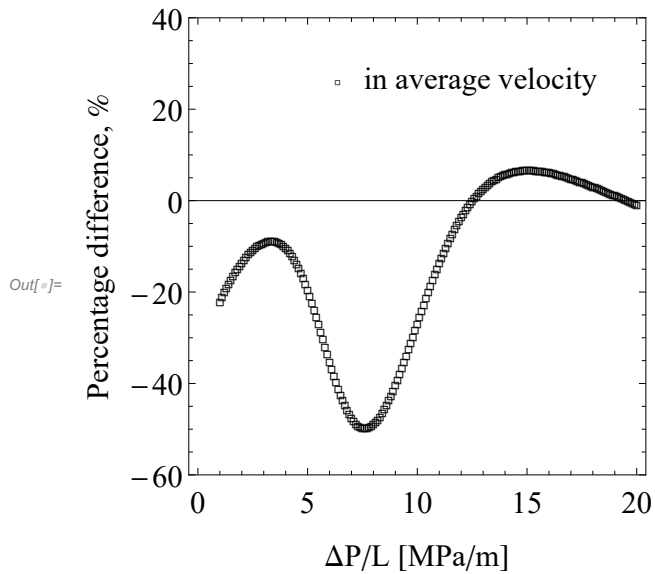

```

In[ ]:= Export["Vavg.pdf", Figure6a, "AllowRasterization" → True, ImageResolution → 600];
Export["VavgPD.pdf", Figure6b, "AllowRasterization" → True, ImageResolution → 600];

```

```

In[ ]:= SystemOpen[DirectoryName[AbsoluteFileName["Vavg.pdf"]]]

```

### 3.2 Shear Rate at the Wall

```

In[ ]:= dM = 2;
oldFigure7a = ListPlot[Table[{PGradient[i], Log10[WallShearRate02[i]]}, {i, 1, M, dM}],
  Table[{PGradient[i], Log10[WallShearRate03[i]]}, {i, 1, M, dM}]], PlotMarkers →
  {{O, 6}, {□, 6}}, PlotStyle → {{Red, Thick}, {Blue, Thick}}, PlotRange → {-2, 3},
  Frame → True, FrameLabel → {"ΔP/L [MPa/m]", "Log10[γw/(1 s-1)"]}, LabelStyle →
  Directive[FontFamily → "Times", FontSize → 16, Black], Background → White, ImageSize →
  300, AspectRatio → 1, PlotLegends → Placed[{"This work", "Traditional"}, {0.70, 0.15}]]

```

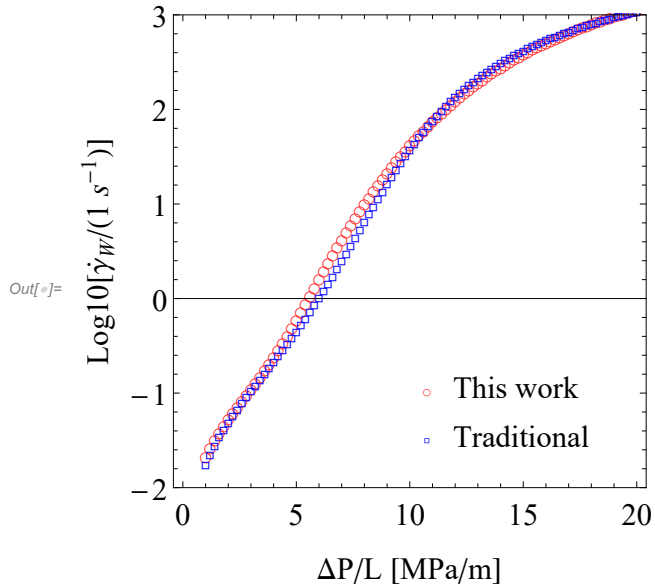

```

In[ ]:= Figure7acheck =
  ContourPlot[ {0.5 * x * 10^6 * PipeRadius == EtaCY[10^y, 37190.11, 598346954.87, 1.2160,
    0.1477, 6911.72, 0.002356, 0.002131] * 10^y, 0.5 * x * 10^6 * PipeRadius ==
    EtaCY[10^y, 40476.13, 598346954.87, 0.7968, 0.1054, 4725.29, 0.003522, 0.003552] * 10^y},
    {x, 1, 20}, {y, -2, 3}, ContourStyle -> {{Red, Thick}, {Blue, Thick}},
    Contours -> 100, WorkingPrecision -> MachinePrecision, PlotPoints -> 200,
    Frame -> True, FrameLabel -> {"ΔP/L [MPa/m]", "Log10[γ̇W/(1 s-1)"]},
    LabelStyle -> Directive[FontFamily -> "Times", FontSize -> 16, Black],
    Background -> White, ImageSize -> 300, AspectRatio -> 1 ]
  (** y = log10(shear rate), x = Pressure gradient **)

```

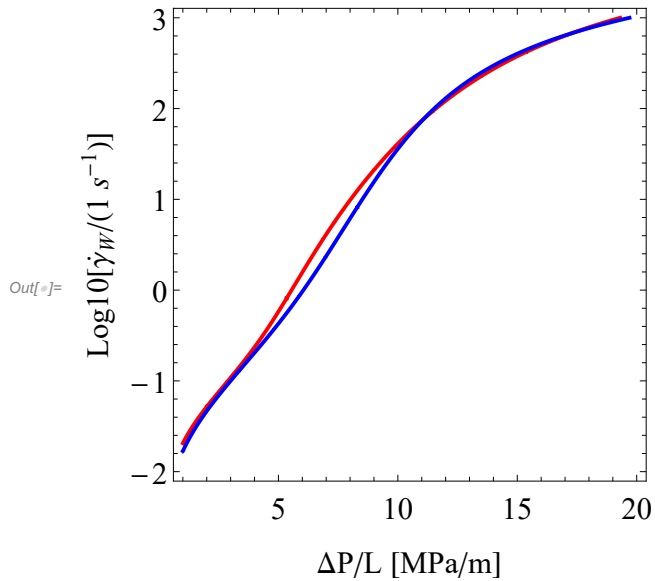

```

In[ ]:= Figure7a = Show[oldFigure7a, Figure7acheck]

```

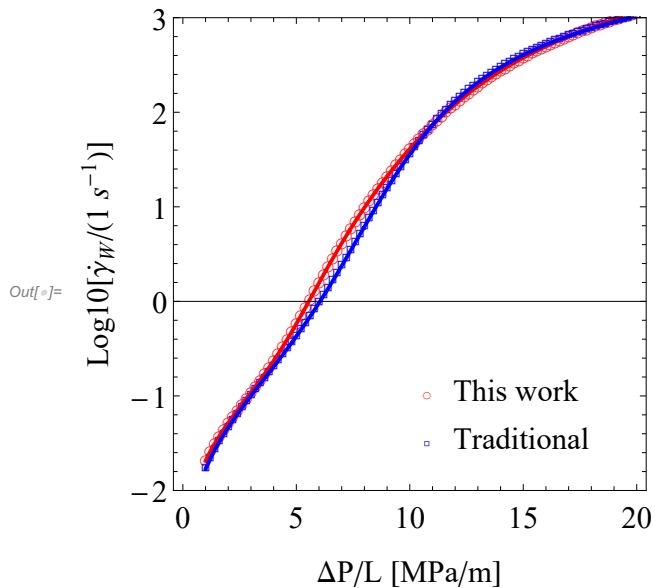

```

In[ ]:= PDGammaWall = Table[{PGradient[i], 100 * (WallShearRate03[i] - WallShearRate02[i]) /
    ((WallShearRate03[i] + WallShearRate02[i]) / 2)}, {i, 1, M}];
Figure7b = ListPlot[{PDGammaWall}, PlotMarkers -> {{□, 6}}, PlotStyle -> {Black},
    GridLines -> None, PlotRange -> {-60, 40}, GridLinesStyle -> Directive[Dashed],
    Frame -> True, FrameLabel -> {"ΔP/L [MPa/m]", "Percentage difference, %"},
    LabelStyle -> Directive[FontFamily -> "Times", FontSize -> 16, Black],
    Background -> White, ImageSize -> 300, AspectRatio -> 1,
    PlotLegends -> Placed[{"in wall shear rate"}, {0.60, 0.87}]]

```

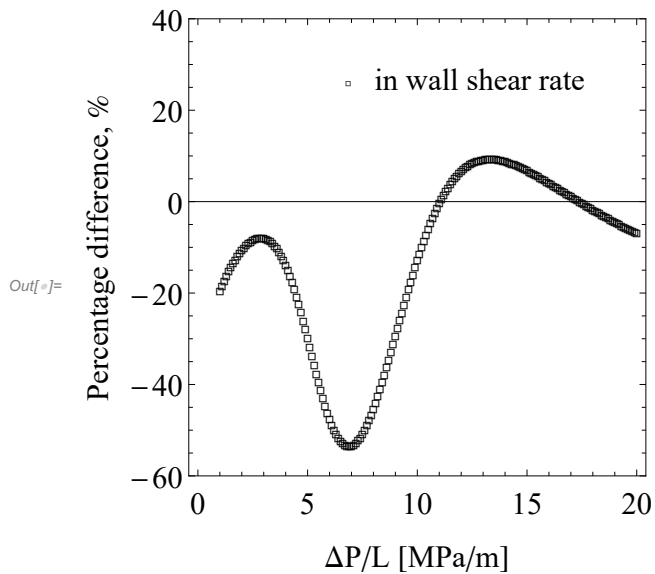

```

Export["WallShearRate.pdf", Figure7a, "AllowRasterization" -> True, ImageResolution -> 600];
Export["WallShearRatePD.pdf", Figure7b, "AllowRasterization" -> True, ImageResolution -> 600];

```

## ShearRateTemperatureViscosity

### 3.1 Velocity and Shear Rate Distribution at Low Pressure Gradient

```

In[ ]:= ClearAll["Global`*"]

In[ ]:= EtaCY[x_, EtaInf_, EtaZero_, a_, n_, Lambda_, atstar_, at_] :=
    (EtaInf + (EtaZero - EtaInf) (1 + (Lambda * at * x)^a)^(n-1)/a) * atstar;
    (** Define the C-Y model viscosity function **)

In[ ]:= PGradient = 7.5 * 10^6 (**= (P0 - PL) / L = Pressure gradient, [
    Pa/m]**); R = 0.05 (**Pipe radius [m]**);

```

```

In[ ]:= (**ode1= (-D[vz[r],r]) * EtaCY[Abs[D[vz[r],r]],37079.27,
      449711022.23,1.241,0.15,5064.697,0.00311,0.00293]==0.5*PGradient*r;
ysol1=NDSolveValue[{ode1,vz[R]==0},vz,{r,0,R},
  Method->{"EquationSimplification"->"Residual"}];**)

ode2 = (-D[vz[r], r]) * EtaCY[Abs[D[vz[r], r]], 37190.11, 598346954.87,
  1.2160, 0.1477, 6911.72, 0.002356, 0.002131] == 0.5 * PGradient * r;
ysol2 = NDSolveValue[{ode2, vz[R] == 0}, vz, {r, 0, R},
  Method -> {"EquationSimplification" -> "Residual"}];

ode3 = (-D[vz[r], r]) * EtaCY[Abs[D[vz[r], r]], 40476.13, 598346954.87,
  0.7968, 0.1054, 4725.29, 0.003522, 0.003552] == 0.5 * PGradient * r;
ysol3 = NDSolveValue[{ode3, vz[R] == 0}, vz, {r, 0, R},
  Method -> {"EquationSimplification" -> "Residual"}];

In[ ]:= Figure8a = Plot[{ysol2[r], ysol3[r]}, {r, 0, R}, FrameLabel -> {"r [m]", "v(r) [m/s]"},
  PlotStyle -> {{Red, Thick}, {Blue, Thick}}, GridLines -> None, PlotRange -> {0, 0.05},
  Frame -> True, LabelStyle -> Directive[FontFamily -> "Times", FontSize -> 16, Black],
  Background -> White, ImageSize -> 300, AspectRatio -> 1,
  PlotLegends -> Placed[{"This work", "Traditional"}, {0.25, 0.2}]]

```

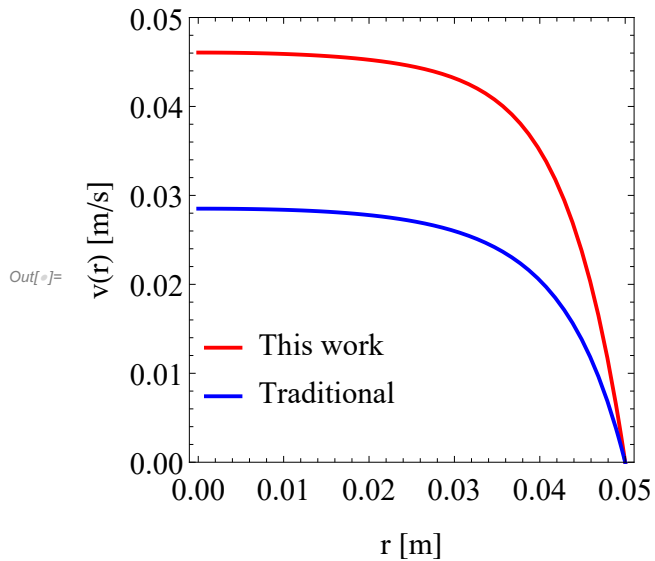

```

In[ ]:= Figure8b1 = Plot[{(-D[ysol2[r], r] /. r -> s), (-D[ysol3[r], r] /. r -> s)}, {s, 0, R},
  FrameLabel -> {"r [m]", " $\dot{\gamma}(r)$  [s-1"]}, PlotStyle -> {{Red, Thick}, {Blue, Thick}},
  GridLines -> None, PlotRange -> {0, 7}, Frame -> True,
  LabelStyle -> Directive[FontFamily -> "Times", FontSize -> 16, Black],
  Background -> White, ImageSize -> 300, AspectRatio -> 1,
  PlotLegends -> Placed[{"This work", "Traditional"}, {0.25, 0.80}]]

```

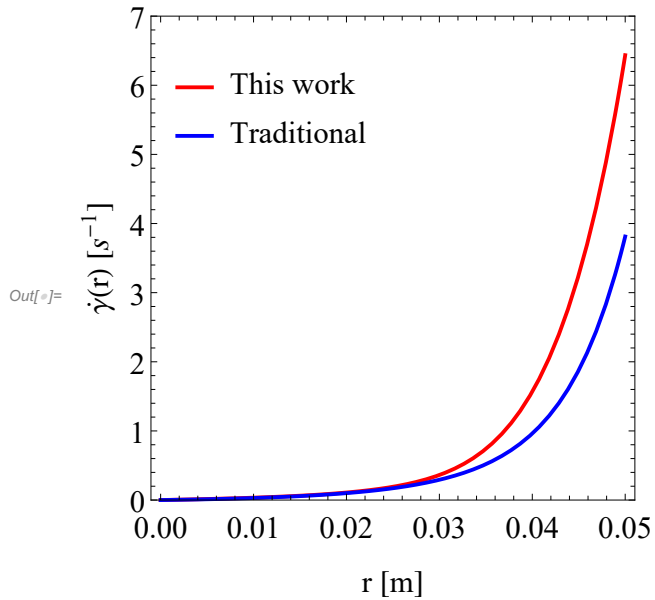

(\*\* Contours→50,WorkingPrecision->MachinePrecision,PlotPoints→200\*\*)

```

In[ ]:= Figure8b2 =
  ContourPlot[{0.5 * PGradient * r == EtaCY[s, 37190.11, 598346954.87, 1.2160, 0.1477,
    6911.72, 0.002356, 0.002131] * s, 0.5 * PGradient * r ==
    EtaCY[s, 40476.13, 598346954.87, 0.7968, 0.1054, 4725.29, 0.003522, 0.003552] * s},
    {r, 0, 0.05}, {s, 0, 7}, ContourStyle -> {{Black, Dashed}, {Black, Dashed}},
    Contours -> 100, WorkingPrecision -> MachinePrecision,
    PlotPoints -> 200, GridLines -> None, Frame -> True,
    LabelStyle -> Directive[FontFamily -> "Times", FontSize -> 16, Black],
    Background -> White, ImageSize -> 300, AspectRatio -> 1]
  (** s = gamma dot, shear rate **)

```

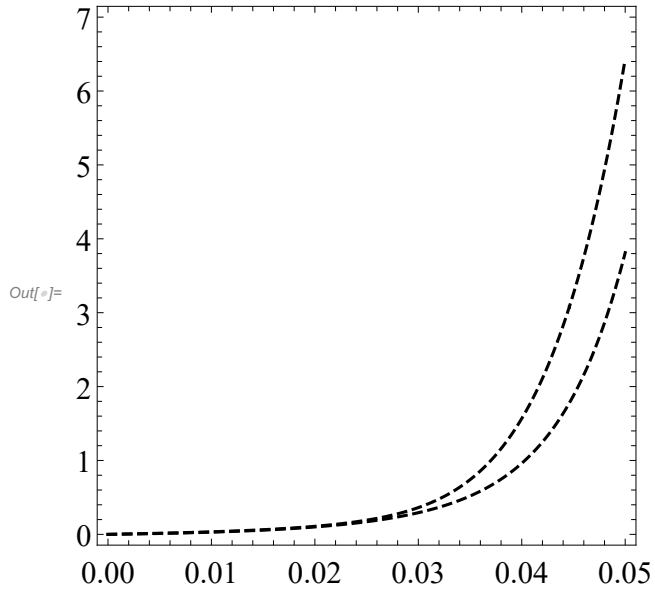

```

In[ ]:= Figure8b = Show[Figure8b1, Figure8b2]

```

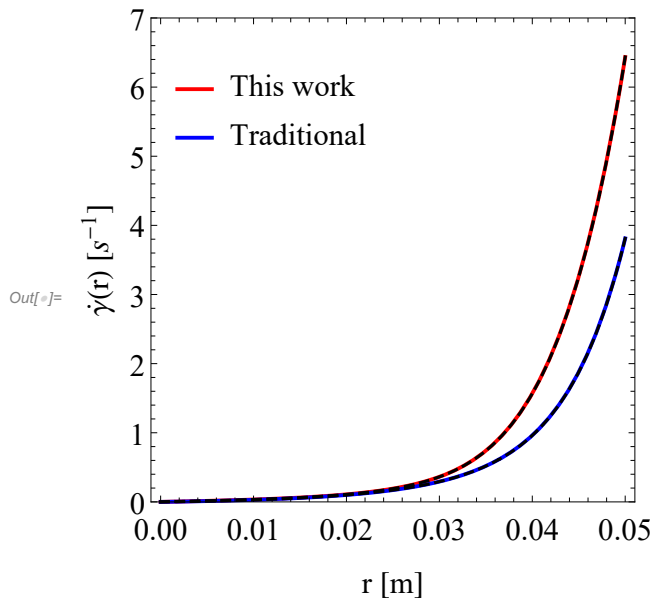



```

In[ ]:= Export["VelocityLowPressure.pdf", Figure8a,
  "AllowRasterization" → True, ImageResolution → 600] ;
Export["ShearRateLowPressure.pdf", Figure8b,
  "AllowRasterization" → True, ImageResolution → 600] ;

```

## 3.2 Velocity and Shear Rate Distribution at High Pressure Gradient

```

In[ ]:= ClearAll["Global`*"]

In[ ]:= EtaCY[x_, EtaInf_, EtaZero_, a_, n_, Lambda_, atstar_, at_] :=
  (EtaInf + (EtaZero - EtaInf) (1 + (Lambda * at * x)^a)^(n-1)/a) * atstar;
  (** Define the C-Y model viscosity function **)

In[ ]:= PGradient = 15 * 10^6 (**= (P0-PL) / L = Pressure gradient, [
  Pa/m]**); R = 0.05 (**Pipe radius [m]**);

In[ ]:= (**ode1= (-D[vz[r], r]) * EtaCY[Abs[D[vz[r], r]], 37079.27,
  449711022.23, 1.241, 0.15, 5064.697, 0.00311, 0.00293] == 0.5 * PGradient * r;
ysol1=NDSolveValue[{ode1, vz[R] == 0}, vz, {r, 0, R},
  Method->{"EquationSimplification" -> "Residual"}];**)

ode2 = (-D[vz[r], r]) * EtaCY[Abs[D[vz[r], r]], 37190.11, 598346954.87,
  1.2160, 0.1477, 6911.72, 0.002356, 0.002131] == 0.5 * PGradient * r;
ysol2 = NDSolveValue[{ode2, vz[R] == 0}, vz, {r, 0, R},
  Method -> {"EquationSimplification" -> "Residual"}];

ode3 = (-D[vz[r], r]) * EtaCY[Abs[D[vz[r], r]], 40476.13, 598346954.87,
  0.7968, 0.1054, 4725.29, 0.003522, 0.003552] == 0.5 * PGradient * r;
ysol3 = NDSolveValue[{ode3, vz[R] == 0}, vz, {r, 0, R},
  Method -> {"EquationSimplification" -> "Residual"}];

```

```

In[ ]:= Figure9a = Plot[{ysol2[r], ysol3[r]}, {r, 0, R}, FrameLabel -> {"r [m]", "v(r) [m/s]"},
  PlotStyle -> {{Red, Thick}, {Blue, Thick}}, GridLines -> None, PlotRange -> {0, 4},
  Frame -> True, LabelStyle -> Directive[FontFamily -> "Times", FontSize -> 16, Black],
  Background -> White, ImageSize -> 300, AspectRatio -> 1,
  PlotLegends -> Placed[{"This work", "Traditional"}, {0.25, 0.2}]]

```

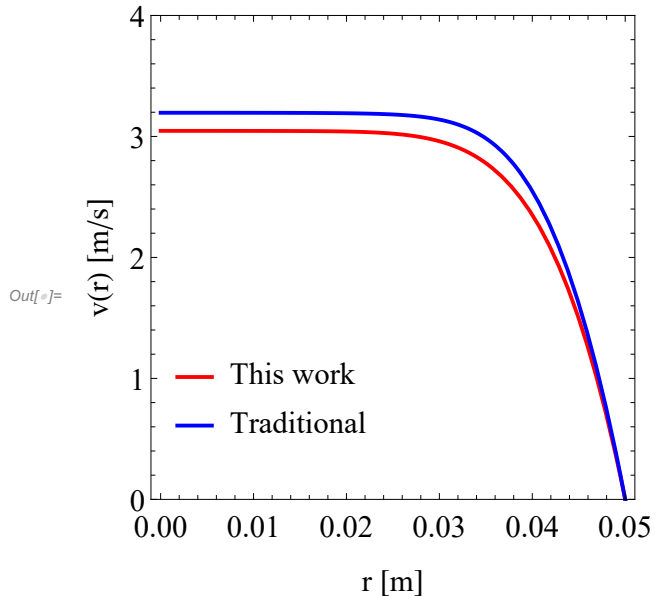

```

In[ ]:= Figure9b1 = Plot[{(-D[ysol2[r], r] /. r -> s), (-D[ysol3[r], r] /. r -> s)}, {s, 0, R},
  FrameLabel -> {"r [m]", "γ̇(r) [s⁻¹]"}, PlotStyle -> {{Red, Thick}, {Blue, Thick}},
  GridLines -> None, PlotRange -> {0, 450}, Frame -> True,
  LabelStyle -> Directive[FontFamily -> "Times", FontSize -> 16, Black],
  Background -> White, ImageSize -> 300, AspectRatio -> 1,
  PlotLegends -> Placed[{"This work", "Traditional"}, {0.25, 0.80}]]

```

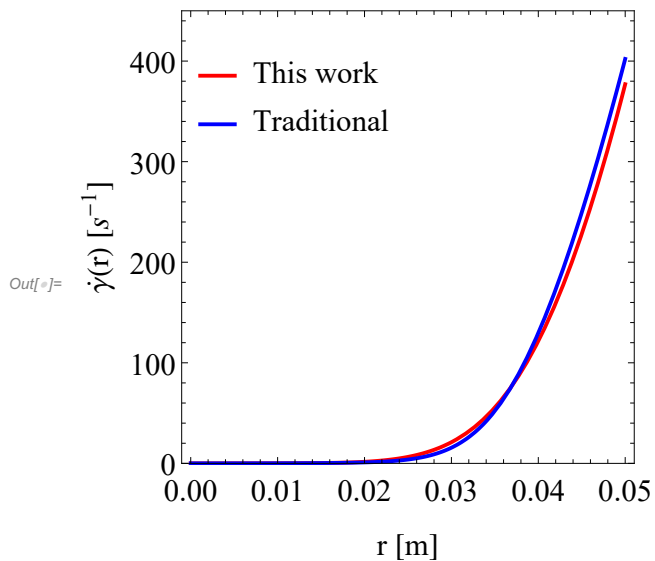

```

In[ ]:= (** Contours->50,WorkingPrecision->MachinePrecision,PlotPoints->200**)

```

In[ ]:= **Figure9b2 =**

```
ContourPlot[{0.5 * PGradient * r == EtaCY[s, 37190.11, 598346954.87, 1.2160, 0.1477,
6911.72, 0.002356, 0.002131] * s, 0.5 * PGradient * r ==
EtaCY[s, 40476.13, 598346954.87, 0.7968, 0.1054, 4725.29, 0.003522, 0.003552] * s},
{r, 0, 0.05}, {s, 0, 450}, ContourStyle -> {{Black, Dashed}, {Black, Dashed}},
Contours -> 100, WorkingPrecision -> MachinePrecision,
PlotPoints -> 200, GridLines -> None, Frame -> True,
LabelStyle -> Directive[FontFamily -> "Times", FontSize -> 16, Black],
Background -> White, ImageSize -> 300, AspectRatio -> 1]
(** s = gamma dot, shear rate **)
```

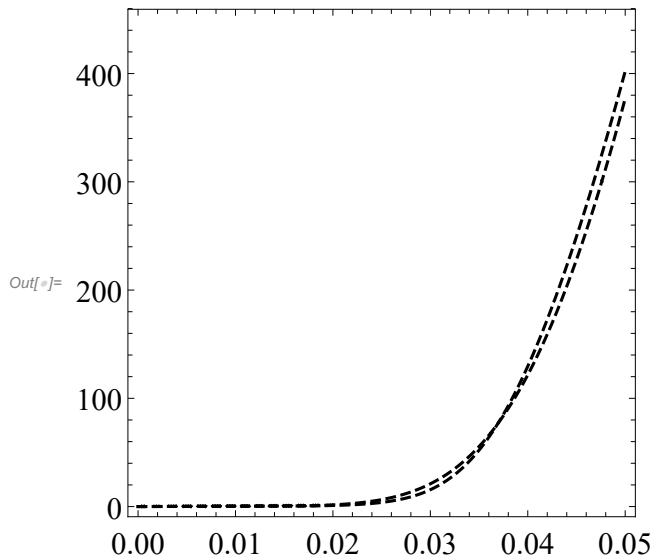

In[ ]:= **Figure9b = Show[Figure9b1, Figure9b2]**

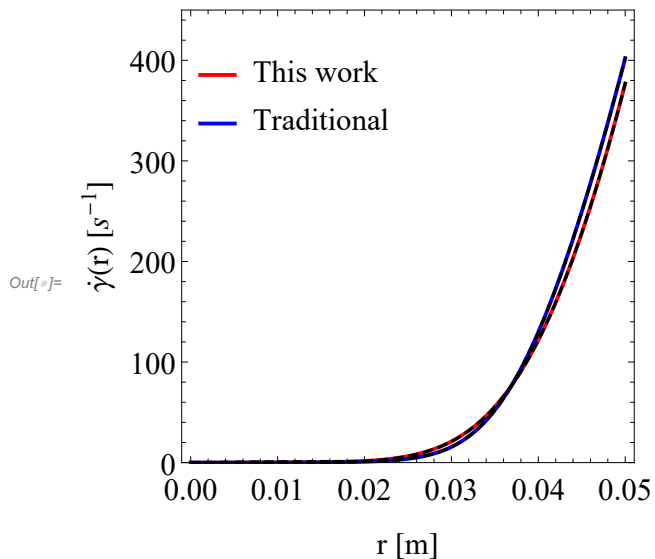

```
In[ ]:= Export["VelocityHighPressure.pdf", Figure9a,
"AllowRasterization" -> True, ImageResolution -> 600] ;
Export["ShearRateHighPressure.pdf", Figure9b,
"AllowRasterization" -> True, ImageResolution -> 600] ;
```

```
In[*]:= SystemOpen[DirectoryName[AbsoluteFileName["VelocityHighPressure.pdf"]]]
```

This is the END. (Last update by Yanwei Wang, November 1, 2021)
